# Supplementary material for: Intergenerational Support and Second-Child Fertility Intention in the Chinese Sandwich Generation: The Parallel Mediation Model of Double Burnout
Source: MDPI journal article supplement (doi:10.3390/bs13030256), 2023-03-14
Supplement: s1 [file s1]

## Supporting Information

**Table S1.** Logistic regression predicting propensity score of supporting.

|                                               | Odds Ratio | SE    | <i>p</i> |
|-----------------------------------------------|------------|-------|----------|
| Father's socioeconomic status                 | 1.212      | 0.060 | 0.000    |
| Mather's socioeconomic status                 | 1.094      | 0.060 | 0.000    |
| Father's age                                  | 0.974      | 0.007 | 0.000    |
| Mather's age                                  | 0.919      | 0.007 | 0.000    |
| Paternal grandfather's socioeconomic status   | 0.990      | 0.006 | 0.084    |
| Maternal grandfather's socioeconomic status   | 1.892      | 0.088 | 0.000    |
| Paternal grandparents' health condition       | 0.665      | 0.087 | 0.002    |
| Maternal grandparents' health condition       | 1.026      | 0.007 | 0.000    |
| Paternal grandfather's <i>hukou</i> (1=rural) | 1.487      | 0.063 | 0.000    |
| Father's occupational reputation              | 1.007      | 0.006 | 0.094    |
| Mather's occupational reputation              | 1.006      | 0.006 | 0.091    |
| First child's gender (1=men)                  | 1.022      | 0.087 | 0.047    |
| Maximum years of parents' education           | 1.007      | 0.018 | 0.707    |
| Living with grandparents or not (1=no)        | 0.992      | 0.073 | 0.012    |
| Firstborn children's age                      | 1.079      | 0.029 | 0.005    |
| Constant                                      | 0.039      | 0.017 | 0.000    |

**Table S2.** Propensity score matching covariate balance.

| Variable                                    |               |           | Mean    |           | % Reduction |                  | t-test |          |
|---------------------------------------------|---------------|-----------|---------|-----------|-------------|------------------|--------|----------|
|                                             |               |           | Treated | Untreated | %Bias       | % Bias Reduction | t      | <i>p</i> |
| Father's socioeconomic status               | socioeconomic | Unmatched | 2.513   | 2.219     | 32.5        | 89.1             | 8.17   | 0.000    |
|                                             |               | Matched   | 2.498   | 2.428     | 3.5         |                  | 0.80   | 0.422    |
| Mather's socioeconomic status               | socioeconomic | Unmatched | 2.420   | 2.202     | 31.5        | 88.2             | 8.17   | 0.000    |
|                                             |               | Matched   | 2.361   | 2.364     | 3.1         |                  | 0.79   | 0.419    |
| Father's age                                |               | Unmatched | 37.096  | 37.724    | -15.8       | 86.4             | -4.01  | 0.000    |
|                                             |               | Matched   | 36.794  | 37.742    | -2.1        |                  | -0.47  | 0.640    |
| Mather's age                                |               | Unmatched | 36.266  | 36.315    | -11.8       | 85.9             | -4.11  | 0.000    |
|                                             |               | Matched   | 36.882  | 36.625    | -2.5        |                  | -0.54  | 0.619    |
| Paternal grandfather's socioeconomic status | grandfather's | Unmatched | 33.751  | 32811     | 8.9         | 77.2             | 2.26   | 0.024    |
|                                             |               | Matched   | 33.748  | 33.736    | -2.0        |                  | -0.49  | 0.623    |
| Maternal grandfather's                      | grandfather's | Unmatched | 32.124  | 31.241    | 10.0        | 86.5             | 2.49   | 0.013    |

|                                         |                       |          |                    |          |         |       |       |       |
|-----------------------------------------|-----------------------|----------|--------------------|----------|---------|-------|-------|-------|
| socioeconomic status                    |                       | Matched  | 32.121             | 32.132   | -1.3    |       | -0.33 | 0.90  |
| Paternal grandparents' health condition | Unmatched             | 4.019    | 3.388              | 67.4     |         | 94.3  | 17.06 | 0.000 |
|                                         | Matched               | 3.998    | 3.879              | 3.8      |         |       | 0.86  | 0.389 |
| Maternal grandparents' health condition | Unmatched             | 3.906    | 3.426              | 46.6     |         | 88.6  | 11.98 | 0.000 |
|                                         | Matched               | 3.876    | 3.895              | 5.3      |         |       | 1.15  | 0.249 |
| Paternal grandfather's hukou (1=rural)  | Unmatched             | 1.213    | 1.221              | -8.6     |         | 84.9  | -2.21 | 0.027 |
|                                         | Matched               | 1.179    | 1.184              | 1.3      |         |       | 0.28  | 0.782 |
| Father's occupational reputation        | Unmatched             | 40.778   | 39.351             | 15.7     |         | 93.7  | 3.97  | 0.000 |
|                                         | Matched               | 40.742   | 40.753             | 1.0      |         |       | 0.23  | 0.815 |
| Mother's occupational reputation        | Unmatched             | 39.639   | 38.157             | 15.2     |         | 93.5  | 3.94  | 0.000 |
|                                         | Matched               | 39.731   | 40.766             | 1.0      |         |       | 0.23  | 0.817 |
| First child's gender (1=men)            | Unmatched             | 1.483    | 1.459              | -9.62    |         | 85.4  | -0.17 | 0.000 |
|                                         | Matched               | 1.485    | 1.475              | 1.2      |         |       | 0.36  | 0.449 |
| Living with grandparents or not (1=no)  | Unmatched             | 1.305    | 1.096              | -2.9     |         | 81.3  | -0.74 | 0.461 |
|                                         | Matched               | 1.301    | 1.236              | 0.5      |         |       | 0.11  | 0.910 |
| Firstborn children's age                | Unmatched             | 9.871    | 7.112              | 56.2     |         | 96.5  | 3.45  | 0.025 |
|                                         | Matched               | 9.195    | 8.964              | 3.8      |         |       | 0.44  | 0.96  |
| Sample                                  | Pseudo-R <sup>2</sup> | $\chi^2$ | p>chi <sup>2</sup> | MeanBias | MedBias | B     | R     | %Var  |
| Unmatched                               | 0.117                 | 425.49   | 0.000              | 18.3     | 10.1    | 86.4* | 1.04* | 64    |
| Matched                                 | 0.002                 | 5.31     | 0.724              | 2.2      | 1.8     | 10.5  | 0.71  | 27    |

Note. p values are from the t-tests(two-tailed). \* if B>25%, R outside [0.5; 2].

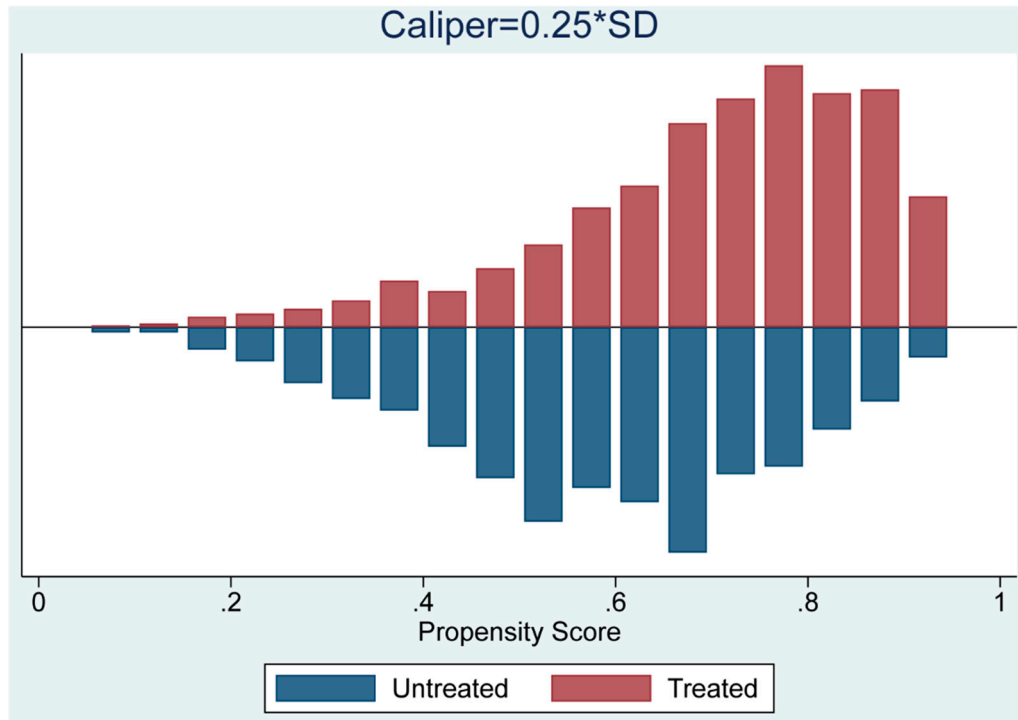

**Figure S1.** Common support of treated and untreated sample.

**Table S3.** Average treatment effect (ATT) of IS on PB, BCG, and SCFI in Chinese sandwich generation.

|                                      |            | PB            | BCG          | SCFI          |
|--------------------------------------|------------|---------------|--------------|---------------|
|                                      |            | ATT           | ATT          | ATT           |
| Nearest neighbor Matching            | Difference | -3.201***     | .289*        | .532***       |
|                                      | T-stat     | -3.77(.830)   | 0.52(.661)   | 8.14 (.051)   |
| Radius Matching                      | Difference | -2.306***     | .090         | .614***       |
|                                      | T-stat     | -5.12(.425)   | 0.43(.325)   | 15.98(.035)   |
| Kernel matching                      | Difference | -2.011***     | .012         | .560***       |
|                                      | T-stat     | -2.73(.601)   | -0.20(.623)  | 11.51(.048)   |
| Local Linear Matching                | Difference | -2.284***     | .108         | .517***       |
|                                      | T-stat     | -2.97(.667)   | 0.11(.61)    | 10.13(.049)   |
| Stratification and Interval Matching | Difference | -2.007***     | -.105        | .539***       |
|                                      | T-stat     | -3.08(.543)   | 0.11(.051)   | 10.672(.0099) |
| Mahalanobis distance matching        | Difference | -3.085***     | .197*        | .639***       |
|                                      | T-stat     | -1.043(0.293) | 0.161(0.081) | 9.27(0.182)   |

Note. \*  $p < 0.05$  \*\*  $p < 0.01$  \*\*\*  $p < 0.001$ .

**Table S4.** Results of sensitivity analysis via regressions using different calipers in PSM.

| Gamma | Sig+    | Sig- | t-hat+ | t-hat- | CI+   | CI-   |
|-------|---------|------|--------|--------|-------|-------|
| 1     | 0       | 0    | 0.53   | 0.86   | 0.566 | 0.598 |
| 2     | 8.7E-15 | 0    | 0.493  | 0.848  | 0.575 | 0.872 |
| 2.1   | 3.6E-12 | 0    | 0.491  | 0.856  | 0.482 | 0.897 |
| 2.2   | 6.1E-10 | 0    | 0.409  | 0.825  | 0.432 | 0.865 |
| 2.3   | 4.6E-08 | 0    | 0.442  | 0.901  | 0.398 | 0.906 |

|     |          |   |        |       |        |       |
|-----|----------|---|--------|-------|--------|-------|
| 2.4 | 1.8E-06  | 0 | 0.401  | 0.811 | 0.271  | 0.932 |
| 2.5 | 0.000011 | 0 | 0.391  | 0.868 | 0.220  | 0.945 |
| 2.6 | 0.000024 | 0 | 0.366  | 0.854 | 0.239  | 0.958 |
| 2.7 | 0.00031  | 0 | 0.353  | 0.878 | 0.211  | 0.975 |
| 2.8 | 0.0039   | 0 | 0.391  | 0.911 | 0.209  | 0.965 |
| 2.9 | 0.0041   | 0 | 0.305  | 0.998 | 0.102  | 0.996 |
| 3   | 0.0057   | 0 | 0.296  | 0.938 | 0.065  | 1.001 |
| 3.1 | 0.05127  | 0 | 0.263  | 0.962 | 0.027  | 1.062 |
| 3.2 | 0.129995 | 0 | 0.241  | 0.992 | 0.016  | 1.084 |
| 3.3 | 0.25831  | 0 | 0.198  | 1.102 | 0.002  | 1.154 |
| 3.4 | 0.56321  | 0 | 0.143  | 1.166 | -0.014 | 1.254 |
| 3.5 | 0.87245  | 0 | 0.122  | 1.257 | -0.029 | 1.268 |
| 5   | 1        | 0 | -0.101 | 1.384 | -0.124 | 1.293 |
| 8   | 1        | 0 | -0.332 | 1.427 | -0.166 | 1.296 |
| 10  | 1        | 0 | -0.467 | 1.562 | -0.185 | 1.311 |

Note:  $\gamma$  - log odds of differential assignment due to unobserved factors;  $\text{sig}^+$  - upper bound significance level;  $\text{sig}^-$  - lower bound significance level;  $\text{t-hat}^+$  - upper bound Hodges-Lehmann point estimate;  $\text{t-hat}^-$  - lower bound Hodges-Lehmann point estimate;  $\text{CI}^+$  - upper bound confidence interval ( $\alpha=.95$ );  $\text{CI}^-$  - lower bound confidence interval ( $\alpha=.95$ ).
